# Supplementary material for: Insights into the composition exploration of novel hydrogen storage alloys: evaluation of the Mg–Ni–Nd–H phase diagram
Source: Royal Society of Chemistry journal article supplement (doi:10.1039/c6ta10090b), 2017-01-01
Supplement: c6ta10090b1.pdf [file c6ta10090b1.pdf]

## Supplementary Materials for

### **Insights into the composition exploration of novel hydrogen storage alloys:**

#### **Evaluation of the Mg–Ni–Nd–H phase diagram**

Qian Li <sup>a, b, d, \*</sup>, Qun Luo <sup>a, \*</sup>, Qin-Fen Gu <sup>c</sup>

<sup>a</sup> State Key Laboratory of Advanced Special Steel & Shanghai Key Laboratory of Advanced Ferrometallurgy, School of Materials Science and Engineering, Shanghai University, Shanghai 200072, China

<sup>b</sup> Institute of Genomic Material, Shanghai University, Shanghai 200444, China

<sup>c</sup> Australian Synchrotron, 800 Blackburn Rd, Clayton 3168, Australia

<sup>d</sup> Shanghai Institute of Materials Genome, Shanghai 200444, China

\* Corresponding author.

E-mail address: shuliqian@shu.edu.cn (Q. Li), qunluo@shu.edu.cn (Q. Luo)

The file includes:

#### **Supplementary Figures**

- Fig. S1 The XRD patterns of samples annealed at 400 °C
- Fig. S2. The SEM images of the samples annealed at (a) 400 °C, (b) 460 °C and (c) 500 °C
- Fig. S3. The DSC curves of annealed alloys with heating and cooling rate of 5 °C /min
- Fig. S4. (a) The calculated phase boundary of L/L+Gas in Mg–Ni–H system compared with experimental data, and (b) the calculated vertical section of Mg<sub>2</sub>Ni–H at 0.328 MPa
- Fig. S5. The fitting curves of the total energies for (a) Nd, (b) NdMg<sub>5</sub>Ni and (c) Nd<sub>16</sub>Mg<sub>96</sub>Ni<sub>12</sub>

**First-Principles Calculations Conditions for Formation Enthalpies of Compounds**

**Calculation Formulae for Hydriding/Dehydriding Kinetics and Calculated Results**

**The Optimized Thermodynamic Parameters in Mg–Ni–Nd–H System**

**CIF File of Nd<sub>16</sub>Mg<sub>96</sub>Ni<sub>12</sub>**

**References**

Supplementary Figures:

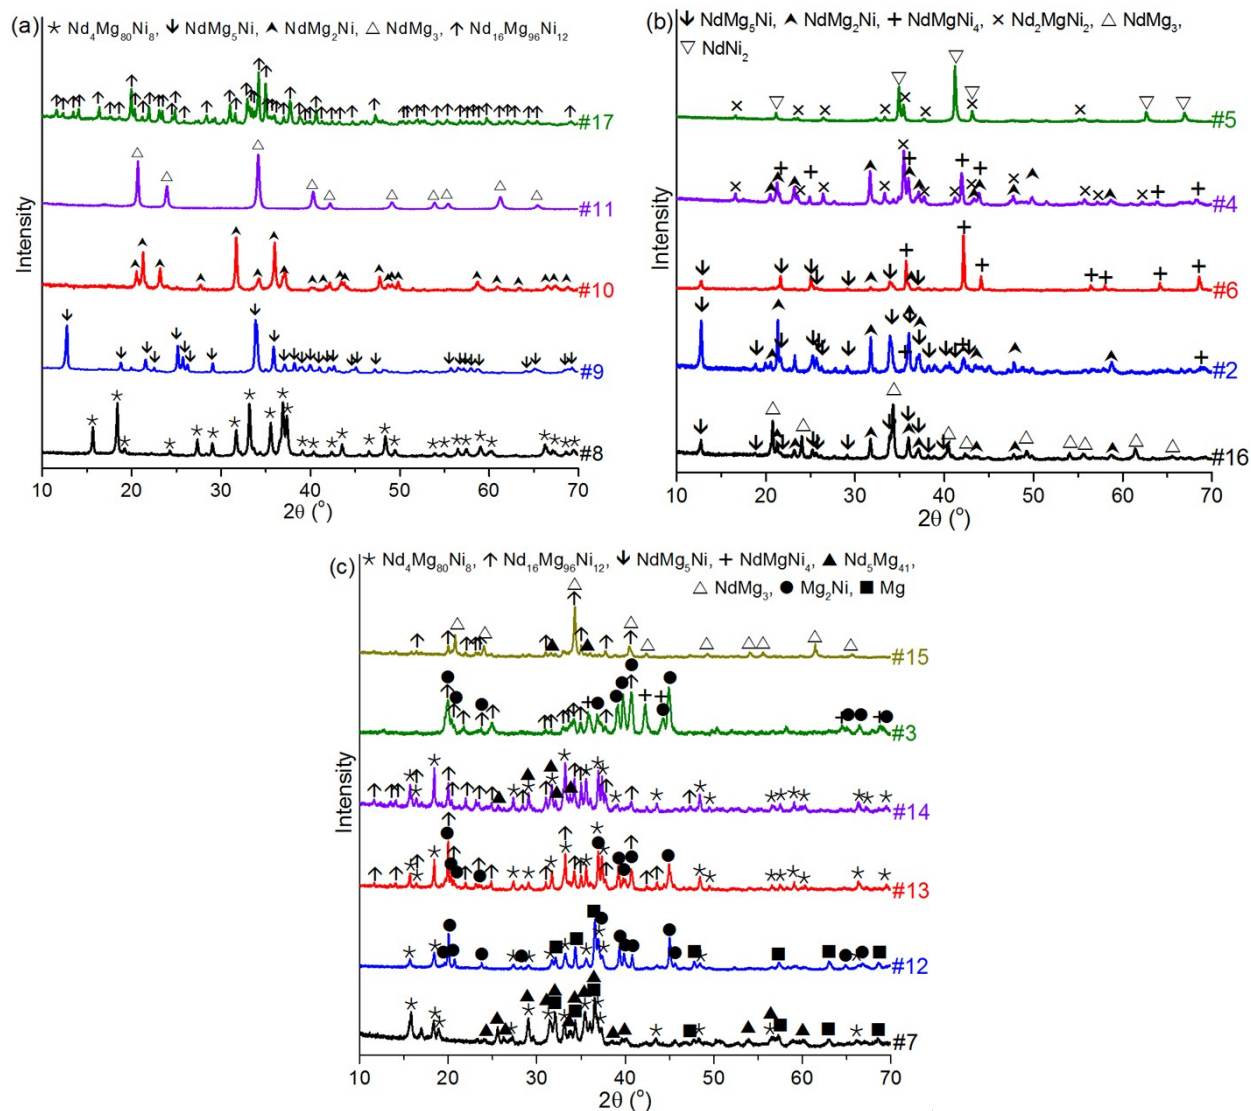

Fig. S1. The XRD patterns of samples annealed at 400 °C





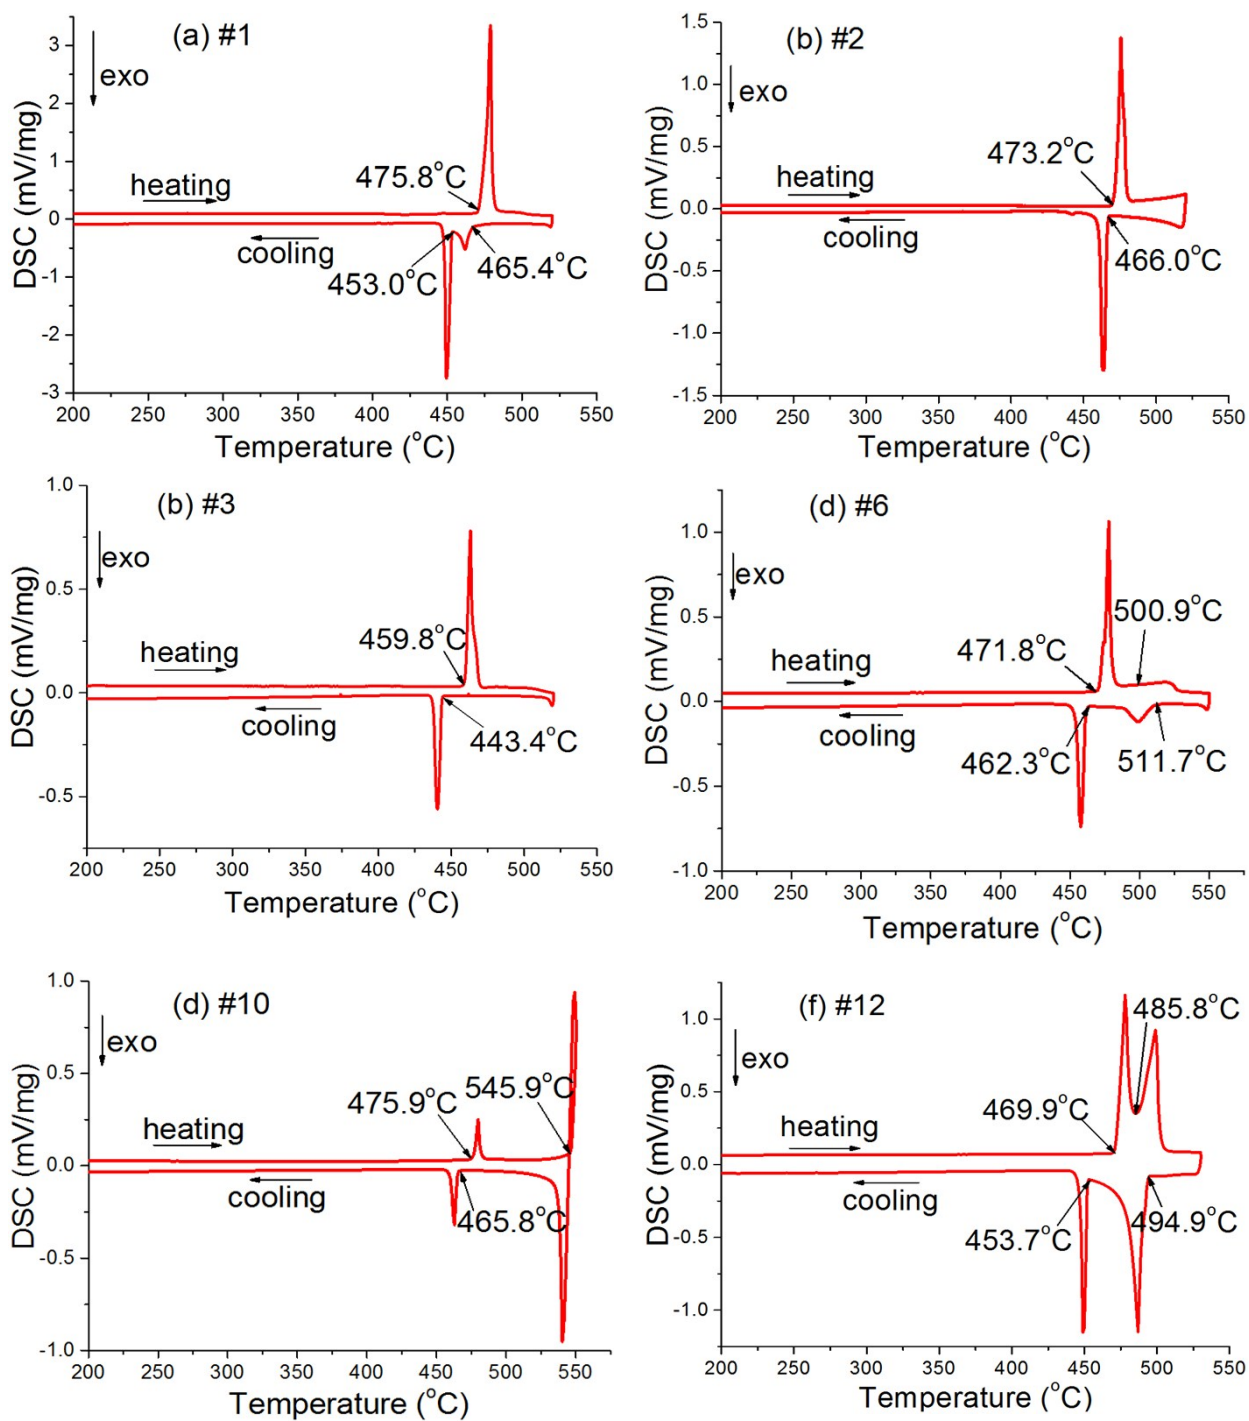

Fig. S3. The DSC curves of annealed alloys with heating and cooling rate of 5 °C /min

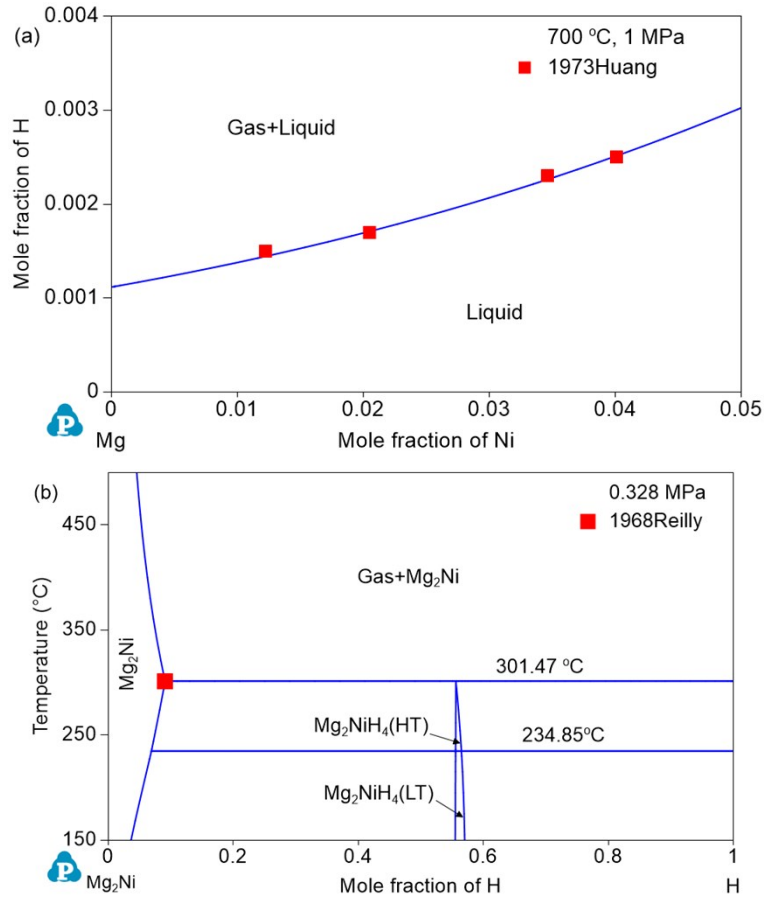

Fig. S4. (a) The calculated phase boundary of L/L+Gas in Mg–Ni–H system compared with experimental data, and (b) the calculated vertical section of Mg<sub>2</sub>Ni–H at 0.328 MPa

### First-Principles Calculations Conditions for Formation Enthalpies of Compounds:

The parameters setting in evaluation of the total energies of phases are listed in Table S1. The total energies of other phases were calculated after geometry optimizations with unit cell volume, shape and atomic positions fully relaxing. However, for Nd, NdMg<sub>5</sub>Ni and Nd<sub>16</sub>Mg<sub>96</sub>Ni<sub>12</sub> phases, the convergence of the self-consistent field cycle can be difficult to achieve. A solid has a certain equilibrium volume  $V_0$ , and the energy increase as volume is increased or decreased a small amount from that value. Therefore, we optimized the atomic positions at fixed cell volumes and calculated the corresponding total energies. Then the total energy dependence on cell volume was fitted by the simplest Murnaghan equation of state,

$$E = E_0 + K_0 \left[ V_0 - V + V \ln \left( \frac{V}{V_0} \right) \right] \quad (\text{S.1})$$

where  $K_0$  is the isothermal bulk modulus, and the  $E_0$  is the equilibrium total energy. The fitted curves are shown in Fig. S5. The optimized structure information are also shown comparing with experimental data in Table S1.

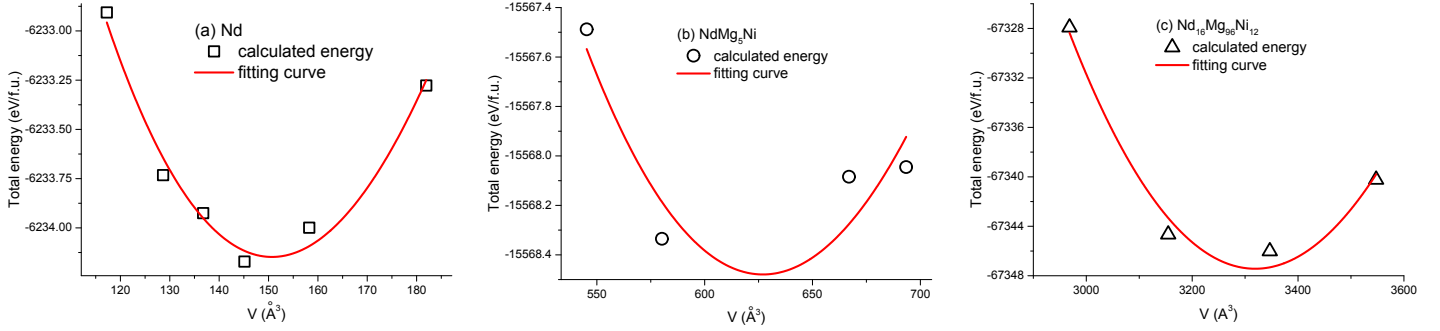

Fig. S5. The fitting curves of the total energies for (a) Nd, (b) NdMg<sub>5</sub>Ni and (c) Nd<sub>16</sub>Mg<sub>96</sub>Ni<sub>12</sub>

Table S1. The conditions for the first-principles calculation

| Phase                                            | Calculated conditions |                     | Calculated results            |                                                        |                        |                            |
|--------------------------------------------------|-----------------------|---------------------|-------------------------------|--------------------------------------------------------|------------------------|----------------------------|
|                                                  | k point               | Cut-off energy (eV) | Lattice parameter (Å) Opt.    | Lattice parameter (Å) Exp.                             | Total Energy (eV/f.u.) | $\Delta H_f$ (kJ/mol-atom) |
| Mg                                               | 7×7×4                 | 400                 | $a=3.23501$ ,<br>$c=5.26135$  | $a=3.2094$ ,<br>$c=5.2103$ [1]                         | -973.9423              |                            |
| Ni                                               | 8×8×8                 | 400                 | $a=3.52773$                   | $a=3.524$ [2]                                          | -1354.3297             |                            |
| Nd                                               | 6×6×2                 | 360                 | $a=3.7312$ ,<br>$c=12.0380$   | $a=3.6582$ ,<br>$c=11.7966$ [3]                        | -1558.5468             |                            |
| Mg <sub>2</sub> Ni                               | 6×6×2                 | 400                 | $a=5.16983$ ,<br>$c=12.88976$ | $a=5.205$ ,<br>$c=13.236$ [4]                          | -3302.8342             | -19.93                     |
| NdNi <sub>5</sub>                                | 6×6×6                 | 400                 | $a=5.03235$ ,<br>$c=4.08709$  | $a=4.949\sim 4.973$ ,<br>$c=3.974\sim 4.0124$<br>[5-9] | -8331.7105             | -24.51                     |
| NdMgNi <sub>4</sub>                              | 4×4×4                 | 400                 | $a=7.16959$                   | $a=7.0988\sim 7.1234$<br>[10, 11]                      | -7951.7195             | -30.88                     |
| NdMg <sub>2</sub> Ni <sub>9</sub>                | 6×6×2                 | 400                 | $a=4.89561$ ,<br>$c=23.80639$ | $a=4.896$ ,<br>$c=23.842$ [12]                         | -15698.8293            | -27.65                     |
| Nd <sub>4</sub> Mg <sub>80</sub> Ni <sub>8</sub> | 2×2×2                 | 400                 | $a=11.2331$                   | $a=11.2743$                                            | -94987.7984            | -3.802                     |



|                                              |                       |     |              |                  |                |          |
|----------------------------------------------|-----------------------|-----|--------------|------------------|----------------|----------|
|                                              |                       |     | 5            | $c=15.9170$ [13] |                |          |
|                                              |                       |     | $c=16.43734$ |                  |                |          |
| $\text{Nd}_{16}\text{Mg}_{96}\text{Ni}_{12}$ | $1 \times 1 \times 1$ | 400 | $a=15.6038$  | $a=15.34197$     | $-134694.8662$ | $-6.110$ |
|                                              |                       |     | $b=22.0448$  | $b=21.67494$     |                |          |
|                                              |                       |     | $c=9.6489$   | $c=9.486856$     |                |          |
| $\text{NdMg}_5\text{Ni}$                     | $4 \times 2 \times 1$ | 400 | $a=4.5047,$  | $a=4.4799,$      | $-7784.2397$   | $-22.89$ |
|                                              |                       |     | $b=10.0393,$ | $b=9.9827,$      |                |          |
|                                              |                       |     | $c=13.8642$  | $c=13.7854$ [14] |                |          |

---

### Calculation Formulae for Hydriding/Dehydriding Kinetics and Calculated Results:

In our previous work [15-17], we have proposed a series of kinetic formulae concerning the kinetics of solid-gas reaction by assuming a specific rate-controlling step, such as surface penetration of hydrogen atoms, diffusion of hydrogen atoms through the hydride product layer to the hydride/metal interface, chemical reaction and nucleus formation producing hydride. When the rate-limiting step is the diffusion of hydrogen in the hydride, the integral form of formula for a spherical particle is

$$\xi = 1 - \left( 1 - \sqrt{\frac{t}{t_{c(d)}}} \right)^3 \quad (\text{S.2})$$

The differential form is

$$\frac{d\xi}{dt} = \frac{3}{2t_{c(d)}} \cdot \frac{(1-\xi)^2}{1-(1-\xi)^{\frac{3}{2}}} \quad (\text{S.3})$$

With regard to the sample which has already been hydrogenated and a layer of hydride has been formed, intergrating Eq. (S.3) with the initial condition of  $\xi = \xi_0$  when  $t = t_0$ , we have

$$\xi = 1 - \left( 1 - \sqrt{\frac{t-t_0}{t_{c(d)}} + \left[ 1 - (1-\xi_0)^{\frac{3}{2}} \right]^2} \right)^3 \quad (\text{S.4})$$

When rate-limiting step is chemical reaction, the intergal form of formula is

$$\xi = 1 - \left( 1 - \frac{t}{t_{c(cr)}} \right)^3 \quad (\text{S.5})$$

where  $\xi$  is the reacted fraction,  $t_{c(d)}$  is the characteristic reaction time representing the required time of a

completely hydriding or dehydriding of the sample.

Using Eqs. (S.2), (S.4) or (S.5) to fit the experimental data, the  $t_c$  can be calculated. The corresponding squared correlation coefficient  $r^2$  reflects the level of agreement between fitting curve and experimental data. Table S2 lists the calculated results for hydrogenation and dehydrogenation of  $\text{Nd}_4\text{Mg}_{80}\text{Ni}_8$ ,  $\text{Nd}_{16}\text{Mg}_{96}\text{Ni}_{12}$  and  $\text{Nd}_{6.7}\text{Mg}_{90.5}\text{Ni}_{2.8}$  alloys.

Table S2. The regression results for hydriding and dehydriding reaction of  $\text{Nd}_4\text{Mg}_{80}\text{Ni}_8$ ,  $\text{Nd}_{16}\text{Mg}_{96}\text{Ni}_{12}$  and  $\text{Nd}_{6.7}\text{Mg}_{90.5}\text{Ni}_{2.8}$  alloys at 350 °C

| Alloys                                           | Hydrogenation                        |                | Dehydrogenation |                                           |                |       |
|--------------------------------------------------|--------------------------------------|----------------|-----------------|-------------------------------------------|----------------|-------|
|                                                  | Rate-limiting step                   | $t_c$<br>(min) | $r^2$           | Rate-limiting step                        | $t_c$<br>(min) | $r^2$ |
| $\text{Nd}_4\text{Mg}_{80}\text{Ni}_8$           | Diffusion ( $0 \leq \xi \leq 0.86$ ) | 2.2            | 0.96            | Chemical reaction ( $0 \leq \xi \leq 1$ ) | 1.4            | 0.99  |
|                                                  | Diffusion ( $0.86 \leq \xi \leq 1$ ) | 17.9           | 0.95            |                                           |                |       |
| $\text{Nd}_{16}\text{Mg}_{96}\text{Ni}_{12}$     | Diffusion ( $0 \leq \xi \leq 0.98$ ) | 6.1            | 0.99            | Chemical reaction ( $0 \leq \xi \leq 1$ ) | 1.9            | 0.99  |
| $\text{Nd}_{6.7}\text{Mg}_{90.5}\text{Ni}_{2.8}$ | Diffusion ( $0 \leq \xi \leq 0.85$ ) | 8.8            | 0.90            | Chemical reaction ( $0 \leq \xi \leq 1$ ) | 4.0            | 0.98  |
|                                                  | Diffusion ( $0.85 \leq \xi \leq 1$ ) | 52.6           | 0.92            |                                           |                |       |

### The Optimized Thermodynamic Parameters in Mg–Ni–Nd–H System

Functions:

$$G^{\text{MgH}_2} = -108422.153 + 495.654622T - 75T \ln T - 3.6920685 \times 10^{-16} T^2 + 5.93903667 \times 10^{-20} T^3 - 1.7334725 \times 10^{-8} T^{-1} \quad [40]$$

$$G^{\text{Mg}_2\text{Ni}} = -20320.4 + 138.49311T - 24.9354T \ln T - 0.001538T^2 + 133805T^{-1} \quad [21]$$

$$G^{\text{MgNi}_2} = -24688.46 + 147.27013T - 25.7998T \ln T - 0.00246496T^2 + 111575.5T^{-1} \quad [21]$$

Phases:

Gas: Model ( $\text{H}_2$ , H, Nd, Ni, H)

$$G_{\text{H}_2}^{\text{Gas}} = {}^{\circ}G_{\text{H}_2}^{\text{Gas}} + RT \ln(9.8692327 \times 10^{-6} P) \quad [57]$$

$$G_{\text{H}}^{\text{Gas}} = {}^{\circ}G_{\text{H}}^{\text{Gas}} + RT \ln(9.8692327 \times 10^{-6} P) \quad [57]$$

$$G_{Nd}^{Gas} = {}^{\circ}G_{Nd}^{Gas} + RT\ln(9.8692327 \times 10^{-6}P) \quad \text{This work}$$

$$G_{Mg}^{Gas} = {}^{\circ}G_{Mg}^{Gas} + RT\ln(9.8692327 \times 10^{-6}P) \quad [57]$$

$$G_{Ni}^{Gas} = {}^{\circ}G_{Ni}^{Gas} + RT\ln(9.8692327 \times 10^{-6}P) \quad [57]$$

Liquid: Model (Nd, Mg, Ni, H)

$$G_{Nd}^L = {}^{\circ}G_{Nd}^{Liquid} \quad [33]$$

$$G_{Mg}^L = {}^{\circ}G_{Mg}^{Liquid} \quad [33]$$

$$G_{Ni}^L = {}^{\circ}G_{Ni}^{Liquid} \quad [35]$$

$$G_H^L = 0.5 {}^{\circ}G_H^{Gas} + 8035 + 25T + 2T\ln T \quad [40]$$

$${}^0L_{Mg,Ni}^L = -50910 + 25.79995T \quad [21]$$

$${}^1L_{Mg,Ni}^L = -14989.95 + 13.24788T \quad [21]$$

$${}^0L_{Mg,Nd}^L = -33208.7 + 10.8T \quad \text{This work}$$

$${}^1L_{Mg,Nd}^L = -15765.6 \quad \text{This work}$$

$${}^2L_{Mg,Nd}^L = -17079 \quad \text{This work}$$

$${}^0L_{Nd,Ni}^L = -166540 + 38.798T \quad [37]$$

$${}^1L_{Nd,Ni}^L = 34987 - 5.354T \quad [37]$$

$${}^2L_{Nd,Ni}^L = 24991 \quad [37]$$

$${}^0L_{Ni,H}^L = -8690.93694 + 10.7429419T \quad [42]$$

$${}^0L_{Mg,H}^L = 13040.4878 - 3.9621749T \quad [42]$$

$${}^0L_{Mg,Ni,Nd}^L = -75460 + 20T \quad \text{This work}$$

$${}^1L_{Mg,Ni,Nd}^L = -45460 + 20T \quad \text{This work}$$

$${}^2L_{Mg,Ni,Nd}^L = -5000 \quad \text{This work}$$

$${}^0L_{Mg,Ni,H}^L = -205000 \quad \text{This work}$$

$${}^1L_{Mg,Ni,H}^L = -288000 \quad \text{This work}$$

$${}^2L_{Mg,Ni,H}^L = 1076135 \quad \text{This work}$$

Hcp: (Mg, Ni, Nd)<sub>1</sub>(H, Va)<sub>0.5</sub>

$$G_{Nd:Va}^{Hcp} = {}^\circ G_{Nd}^{Dhcp} + 303.4 \quad [33]$$

$$G_{Mg:Va}^{Hcp} = {}^\circ G_{Mg}^{Hcp} \quad [33]$$

$$G_{Ni:Va}^{Hcp} = {}^\circ G_{Ni}^{Hcp} \quad [21]$$

$$G_{Mg:H}^{Hcp} = G^{MgH_2} - 0.75 {}^\circ G_{H_2}^{Gas} + 87394.9 - 122.339T \quad [40]$$

$$G_{Ni:H}^{Hcp} = {}^\circ G_{Ni}^{Fcc} + 0.25 {}^\circ G_{H_2}^{Gas} + 50000 \quad \text{This work}$$

$${}^0L_{Mg,Ni:Va}^{Hcp} = 80T \quad [21]$$

$${}^0L_{Mg,Nd:Va}^{Hcp} = -13800 + 2.5T \quad \text{This work}$$

$${}^1L_{Mg,Nd:Va}^{Hcp} = -8000 \quad \text{This work}$$

Dhcp: Model (Nd, Ni)<sub>1</sub>(H, Va)<sub>2</sub>

$$G_{Nd:Va}^{Dhcp} = {}^\circ G_{Nd}^{Dhcp} \quad [33]$$

$$G_{Mg:Va}^{Dhcp} = {}^\circ G_{Mg}^{Hcp} + 303.4 \quad [33]$$

$$G_{Ni:Va}^{Dhcp} = {}^\circ G_{Ni}^{Dhcp} + 500 \quad [35]$$

$$G_{Nd:H}^{Dhcp} = {}^\circ G_{Nd}^{Dhcp} + {}^\circ G_{H_2}^{Gas} - 146740.654 + 118.589T \quad \text{This work}$$

$${}^0L_{Mg,Nd:Va}^{Dhcp} = 45066.1 - 19.585T \quad [33]$$

$${}^1L_{Mg,Nd:Va}^{Dhcp} = 54492.8 - 9.86T \quad [33]$$

$${}^0L_{Nd,Ni:Va}^{Dhcp} = -10000 \quad [35]$$

Bcc: Model (Nd, Mg, Ni)<sub>1</sub>(H, Va)<sub>3</sub>

$$G_{Nd:Va}^{Bcc} = {}^\circ G_{Nd}^{Bcc} \quad [33]$$

$$G_{Mg:Va}^{Bcc} = {}^\circ G_{Mg}^{Bcc} \quad [33]$$

$$G_{Ni:Va}^{Bcc} = {}^\circ G_{Ni}^{Bcc} \quad [35]$$

$$G_{Nd:H}^{Bcc} = {}^{\circ}G_{Nd}^{Bcc} + 1.5{}^{\circ}G_{H_2}^{Gas} - 135207.418 + 108.37T \quad \text{This work}$$

$${}^0L_{Nd,Ni:Va}^{Bcc} = -8500 \quad [35]$$

$${}^0L_{Mg,Nd:Va}^{Bcc} = -26221.4 + 3.9T \quad [33]$$

$${}^1L_{Mg,Nd:Va}^{Bcc} = -28096.4 + 10.3T \quad [33]$$

$${}^2L_{Mg,Nd:Va}^{Bcc} = -15898.5 \quad [33]$$

Fcc: Model (Ni, Mg, Nd)<sub>1</sub>(H, Va)<sub>1</sub>

$$G_{Ni:Va}^{Fcc} = {}^{\circ}G_{Ni}^{Fcc} \quad [21]$$

$$G_{Mg:Va}^{Fcc} = {}^{\circ}G_{Mg}^{Fcc} \quad [21]$$

$$G_{Nd:Va}^{Fcc} = {}^{\circ}G_{Nd}^{Fcc} \quad [35]$$

$$G_{Ni:H}^{Fcc} = {}^{\circ}G_{Ni}^{Fcc} + 0.5{}^{\circ}G_{H_2}^{Gas} - 3120.7324 + 180.5062T - 16.255T \ln T \\ + 6.052879 \times 10^{-4} T^2 \quad [42]$$

$$G_{Nd:H}^{Fcc} = {}^{\circ}G_{Nd}^{Fcc} + 0.5{}^{\circ}G_{H_2}^{Gas} + 50000 \quad \text{This work}$$

$$G_{Mg:H}^{Fcc} = G^{MgH_2} - 0.5{}^{\circ}G_{H_2}^{Gas} + 80T \quad [40]$$

$${}^0L_{Nd,Ni:Va}^{Fcc} = 100000 \quad [35]$$

$${}^0L_{Mg,Ni:Va}^{Fcc} = 80T \quad [21]$$

$${}^0T_{CNi:Va}^{Fcc} = 633 \quad [42]$$

$${}^0\beta_{Ni:Va}^{Fcc} = 0.52 \quad [42]$$

NdMg: Model (Mg, Ni, Nd)<sub>0.5</sub>(Mg, Ni, Nd)<sub>0.5</sub>(H, Va)<sub>3</sub>

$$G_{Mg:Mg:Va}^{NdMg} = 0 \quad [33]$$

$$G_{Nd:Nd:Va}^{NdMg} = 0 \quad [33]$$

$$G_{Mg:Nd:Va}^{NdMg} = -30734.3 + 7.42174T \quad [33]$$

$$G_{Nd:Mg:Va}^{NdMg} = -30734.3 + 7.42174T \quad [33]$$

$${}^0L_{Mg,Nd:Nd:Va}^{NdMg} = -20304.5 \quad [33]$$

$${}^1L_{Mg,Nd:Nd:Va}^{NdMg} = 8287.52 \quad [33]$$

$${}^0L_{Nd:Mg,Nd:Va}^{NdMg} = -20304.5 \quad [33]$$

$${}^1L_{Nd:Mg,Nd:Va}^{NdMg} = 8287.52 \quad [33]$$

NdMg<sub>2</sub>: Model (Mg)<sub>2</sub>(Nd)<sub>1</sub>

$$G_{Mg:Nd}^{NdMg_2} = 2^\circ G_{Mg}^{Hcp} + {}^\circ G_{Mg}^{Dhcp} - 45530 + 9T \quad [33]$$

NdMg<sub>3</sub>: Model (Mg, Ni)<sub>2</sub>(Nd, Mg)<sub>1</sub>

$$G_{Mg:Mg}^{NdMg_3} = 4^\circ G_{Mg}^{Hcp} + 12400 - 8.4T \quad [33]$$

$$G_{Mg:Nd}^{NdMg_3} = 3^\circ G_{Mg}^{Hcp} + {}^\circ G_{Nd}^{Dhcp} - 75831.5 + 26.9T \quad [33]$$

$${}^0L_{Mg:Mg,Nd}^{NdMg_3} = 7999.8 \quad [33]$$

Nd<sub>5</sub>Mg<sub>41</sub>: Model (Mg, Nd)<sub>41</sub>(Nd, Mg, Ni)<sub>5</sub>

$$G_{Mg:Mg}^{Nd_5Mg_{41}} = 46^\circ G_{Mg}^{Hcp} + 138000 \quad [33]$$

$$G_{Nd:Nd}^{Nd_5Mg_{41}} = 46^\circ G_{Nd}^{Hcp} + 138000 \quad [33]$$

$$G_{Mg:Nd}^{Nd_5Mg_{41}} = 41^\circ G_{Mg}^{Hcp} + 5^\circ G_{Nd}^{Dhcp} - 459385.6 + 217.3T \quad [33]$$

$$G_{Nd:Mg}^{Nd_5Mg_{41}} = 5^\circ G_{Mg}^{Hcp} + 41^\circ G_{Nd}^{Dhcp} + 459385.6 - 217.3T \quad [33]$$

$$G_{Mg:Ni}^{Nd_5Mg_{41}} = 41^\circ G_{Mg}^{Hcp} + 5^\circ G_{Ni}^{Fcc} + 10T \quad \text{This work}$$

$${}^0L_{Mg,Nd:Mg}^{Nd_5Mg_{41}} = -51679.8 + 10.2T \quad [33]$$

$${}^0L_{Mg,Nd:Nd}^{Nd_5Mg_{41}} = -51679.8 + 10.2T \quad [33]$$

$${}^0L_{Mg:Mg,Nd}^{Nd_5Mg_{41}} = -56137.8 + 3.7T \quad [33]$$

$${}^0L_{Nd:Mg,Nd}^{Nd_5Mg_{41}} = -56137.8 + 3.7T \quad [33]$$

Mg<sub>2</sub>Ni: Model (Mg)<sub>0.6667</sub>(Ni)<sub>0.3333</sub>(H, Va)<sub>0.3333</sub>

$$G_{Mg:Ni:Va}^{Mg_2Ni} = G^{Mg_2Ni} \quad [21]$$

$$G_{Mg:Ni:H}^{Mg_2Ni} = G^{Mg_2Ni} + 0.16665^\circ G_{H_2}^{Gas} - 5832.3393 + 14.11655T \quad \text{This work}$$

MgNi<sub>2</sub>: Model (Mg, Ni)<sub>0.3333</sub>(Ni, Mg)<sub>0.6667</sub>

$$G_{Mg:Ni}^{MgNi_2} = G^{MgNi_2} \quad [21]$$

$$G_{Mg:Mg}^{MgNi_2} = {}^\circ G_{Mg}^{Hcp} + 764.706 + 20.5885T \quad [21]$$

$$G_{Ni:Mg}^{MgNi_2} = 0.6667{}^\circ G_{Mg}^{Hcp} + 0.3333{}^\circ G_{Ni}^{Fcc} + 1000 \quad [21]$$

$$G_{Ni:Ni}^{MgNi_2} = {}^\circ G_{Ni}^{Fcc} + 5254.902 + 6.862745T \quad [21]$$

Nd<sub>3</sub>Ni: Model (Nd)<sub>0.75</sub>(Ni)<sub>0.25</sub>

$$G_{Nd:Ni}^{Nd_3Ni} = 0.75{}^\circ G_{Nd}^{Dhcp} + 0.25{}^\circ G_{Ni}^{Fcc} - 28093 + 7.967T \quad [35]$$

Nd<sub>7</sub>Ni<sub>3</sub>: Model (Nd)<sub>0.7</sub>(Ni)<sub>0.3</sub>

$$G_{Nd:Ni}^{Nd_7Ni_3} = 0.7{}^\circ G_{Nd}^{Dhcp} + 0.3{}^\circ G_{Ni}^{Fcc} - 33789 + 10.595T \quad [35]$$

NdNi: Model (Nd)<sub>0.5</sub>(Ni)<sub>0.5</sub>

$$G_{Nd:Ni}^{NdNi} = 0.5{}^\circ G_{Nd}^{Dhcp} + 0.5{}^\circ G_{Ni}^{Fcc} - 46879 + 12.065T \quad [35]$$

NdNi<sub>2</sub>: Model (Nd)<sub>0.3333</sub>(Ni)<sub>0.6667</sub>

$$G_{Nd:Ni}^{NdNi_2} = 0.3333{}^\circ G_{Nd}^{Dhcp} + 0.6667{}^\circ G_{Ni}^{Fcc} - 36591.721 + 4.306T \quad \text{This work}$$

NdNi<sub>3</sub>: Model (Nd)<sub>0.25</sub>(Ni)<sub>0.75</sub>

$$G_{Nd:Ni}^{NdNi_3} = 0.25{}^\circ G_{Nd}^{Dhcp} + 0.75{}^\circ G_{Ni}^{Fcc} - 32262.113 + 3.493T \quad \text{This work}$$

Nd<sub>2</sub>Ni<sub>7</sub>: Model (Nd)<sub>0.2222</sub>(Ni)<sub>0.7778</sub>

$$G_{Nd:Ni}^{Nd_2Ni_7} = 0.2222{}^\circ G_{Nd}^{Dhcp} + 0.7778{}^\circ G_{Ni}^{Fcc} - 30893.89 + 3.506T \quad \text{This work}$$

Nd<sub>2</sub>Ni<sub>17</sub>: Model (Nd)<sub>0.1053</sub>(Ni)<sub>0.8947</sub>

$$G_{Nd:Ni}^{Nd_2Ni_{17}} = 0.1053{}^\circ G_{Nd}^{Dhcp} + 0.8947{}^\circ G_{Ni}^{Fcc} - 16387.5 + 1.62603T \quad \text{This work}$$

NdNi<sub>5</sub>: Model (Nd)<sub>0.1667</sub>(Ni)<sub>0.8333</sub>(H, Va)<sub>0.5</sub> Para. Set 1

$$G_{Nd:Ni:Va}^{NdNi_5} = 0.1667{}^\circ G_{Nd}^{Dhcp} + 0.8333{}^\circ G_{Ni}^{Fcc} - 28248.82 + 4.088T \quad \text{Para. Set 1 This work}$$

$$G_{Nd:Ni:H}^{NdNi_5} = 0.1667{}^\circ G_{Nd}^{Dhcp} + 0.8333{}^\circ G_{Ni}^{Fcc} + 0.25{}^\circ G_{H_2}^{Gas} - 36328 + 36T \quad \text{Para. Set 1 This work}$$

$${}^0 L_{Nd:Ni:H, Va}^{NdNi_5} = 10000 \quad \text{Para. Set 1 This work}$$

$${}^1 L_{Nd:Ni:H, Va}^{NdNi_5} = 18000 \quad \text{Para. Set 1 This work}$$

NdMgNi<sub>4</sub>: Model (Nd)<sub>0.1667</sub>(Mg)<sub>0.1667</sub>(Ni)<sub>0.6666</sub>(H, Va)<sub>0.6666</sub>

$$G_{Nd:Mg:Ni:Va}^{NdMgNi_4} = 0.1667^\circ G_{Nd}^{Dhcp} + 0.1667^\circ G_{Mg}^{Hcp} + 0.6667^\circ G_{Ni}^{Fcc} - 37333.33 + 10.5T \quad \text{This work}$$

$$G_{Nd:Mg:Ni:H}^{NdMgNi_4} = 0.1667^\circ G_{Nd}^{Dhcp} + 0.1667^\circ G_{Mg}^{Hcp} + 0.6667^\circ G_{Ni}^{Fcc} + 0.3333^\circ G_{H_2}^{Gas} - 30947.4 + 35.5T \quad \text{This work}$$

$${}^0L_{Nd:Mg:Ni:H, Va}^{NdMgNi_4} = -8000 \quad \text{This work}$$

$${}^1L_{Nd:Mg:Ni:H, Va}^{NdMgNi_4} = 8000 \quad \text{This work}$$

NdMg<sub>2</sub>Ni<sub>9</sub>: Model (Nd)<sub>0.0833</sub>(Mg)<sub>0.1667</sub>(Ni)<sub>0.75</sub>(H, Va)<sub>2.8333</sub>

$$G_{Nd:Mg:Ni:Va}^{NdMg_2Ni_9} = 0.0833^\circ G_{Nd}^{Dhcp} + 0.1667^\circ G_{Mg}^{Hcp} + 0.75^\circ G_{Ni}^{Fcc} - 23713.34 + 5.09T \quad \text{This work}$$

$$G_{Nd:Mg:Ni:H}^{NdMg_2Ni_9} = 0.0833^\circ G_{Nd}^{Dhcp} + 0.1667^\circ G_{Mg}^{Hcp} + 0.75^\circ G_{Ni}^{Fcc} + 1.4167^\circ G_{H_2}^{Gas} - 30475 + 118.5T \quad \text{This work}$$

Nd<sub>2</sub>MgNi<sub>2</sub>: Model (Nd)<sub>0.4</sub>(Mg)<sub>0.2</sub>(Ni)<sub>0.4</sub>

$$G_{Nd:Mg:Ni}^{Nd_2MgNi_2} = 0.4^\circ G_{Nd}^{Dhcp} + 0.2^\circ G_{Mg}^{Hcp} + 0.4^\circ G_{Ni}^{Fcc} - 51000.37 + 22.84T \quad \text{This work}$$

NdMg<sub>2</sub>Ni: Model (Nd)<sub>0.25</sub>(Mg)<sub>0.5</sub>(Ni)<sub>0.25</sub>

$$G_{Nd:Mg:Ni}^{NdMg_2Ni} = 0.25^\circ G_{Nd}^{Dhcp} + 0.5^\circ G_{Mg}^{Hcp} + 0.25^\circ G_{Ni}^{Fcc} - 43264.12 + 9.7T + 2064.75 \ln T \quad \text{This work}$$

Nd<sub>4</sub>Mg<sub>80</sub>Ni<sub>8</sub>: Model (Nd)<sub>0.04</sub>(Mg)<sub>0.87</sub>(Ni)<sub>0.09</sub>

$$G_{Nd:Mg:Ni}^{Nd_4Mg_{80}Ni_8} = 0.04^\circ G_{Nd}^{Dhcp} + 0.87^\circ G_{Mg}^{Hcp} + 0.09^\circ G_{Ni}^{Fcc} - 9292 + 9.36T - 0.7T \ln T + 9800T^2 \quad \text{This work}$$

Nd<sub>16</sub>Mg<sub>96</sub>Ni<sub>12</sub>: Model (Nd, Ni)<sub>0.13</sub>(Mg)<sub>0.77</sub>(Ni)<sub>0.10</sub>

$$G_{Nd:Mg:Ni}^{Nd_{16}Mg_{96}Ni_{12}} = 0.13^\circ G_{Nd}^{Dhcp} + 0.77^\circ G_{Mg}^{Hcp} + 0.10^\circ G_{Ni}^{Fcc} - 16618.625 + 7.5T \quad \text{This work}$$

$$G_{Ni:Mg:Ni}^{Nd_{16}Mg_{96}Ni_{12}} = 0.77^\circ G_{Mg}^{Hcp} + 0.23^\circ G_{Ni}^{Fcc} + 14T \quad \text{This work}$$

$${}^0L_{Nd, Ni: Mg: Ni}^{Nd_{16}Mg_{96}Ni_{12}} = -17467.75 - 5.775T \quad \text{This work}$$

NdMg<sub>5</sub>Ni: Model (Nd)<sub>0.14</sub>(Mg)<sub>0.72</sub>(Ni)<sub>0.14</sub>

$$G_{Nd:Mg:Ni}^{NdMg_5Ni} = 0.14^\circ G_{Nd}^{Dhcp} + 0.72^\circ G_{Mg}^{Hcp} + 0.14^\circ G_{Ni}^{Fcc} - 18921.324 + 7.965T - 153458.05T^{-1} \quad \text{This work}$$

γ: Model (Nd)<sub>1</sub>(H, Va)<sub>2</sub>



|                                                                                                                                                |             |           |
|------------------------------------------------------------------------------------------------------------------------------------------------|-------------|-----------|
| $G_{Nd:Va}^{\gamma} = {}^{\circ}G_{Nd}^{Dhcp} + 800$                                                                                           |             | This work |
| $G_{Nd:H}^{\gamma} = {}^{\circ}G_{Nd}^{Dhcp} + {}^{\circ}G_{H_2}^{Gas} - 138675.944 + 104.16T$                                                 |             | This work |
| NdH <sub>2</sub> : Mdoel (Nd) <sub>1</sub> (H, Va) <sub>2</sub> (H, Va) <sub>1</sub>                                                           |             |           |
| $G_{Nd:H:H}^{NdH_2} = {}^{\circ}G_{Nd}^{Dhcp} + 1.5{}^{\circ}G_{H_2}^{Gas} - 186000 + 157T$                                                    |             | This work |
| $G_{Nd:H:Va}^{NdH_2} = {}^{\circ}G_{Nd}^{Dhcp} + {}^{\circ}G_{H_2}^{Gas} - 187451.375 + 124.5T$                                                |             | This work |
| $G_{Nd:Va:Va}^{NdH_2} = {}^{\circ}G_{Nd}^{Dhcp} + 50000$                                                                                       |             | This work |
| $G_{Nd:Va:H}^{NdH_2} = {}^{\circ}G_{Nd}^{Dhcp} + 0.5{}^{\circ}G_{H_2}^{Gas} - 100000 + 140T$                                                   |             | This work |
| NdNi <sub>5</sub> H <sub>3</sub> : Model (Nd) <sub>0.1667</sub> (Ni) <sub>0.8333</sub> (H) <sub>0.5</sub> (H, Va) <sub>1</sub>                 |             |           |
| $G_{Nd:Ni:H:Va}^{NdNi_5H_3} = 0.1667{}^{\circ}G_{Nd}^{Dhcp} + 0.8333{}^{\circ}G_{Ni}^{Fcc} + 0.25{}^{\circ}G_{H_2}^{Gas} - 36328 + 36T$        | Para. Set 1 | This work |
| $G_{Nd:Ni:H:H}^{NdNi_5H_3} = 0.1667{}^{\circ}G_{Nd}^{Dhcp} + 0.8333{}^{\circ}G_{Ni}^{Fcc} + 0.75{}^{\circ}G_{H_2}^{Gas} - 41168.616 + 87.596T$ | Para. Set 1 | This work |
| ${}^0L_{Nd:Ni:H:H,Va}^{NdNi_5H_3} = -423.529 - 2.941T$                                                                                         | Para. Set 1 | This work |
| ${}^1L_{Nd:Ni:H:H,Va}^{NdNi_5H_3} = 4000$                                                                                                      | Para. Set 1 | This work |
| NdNi <sub>5</sub> H <sub>6</sub> : Model (Nd) <sub>0.1667</sub> (Ni) <sub>0.8333</sub> (H) <sub>0.5</sub> (H, Va) <sub>1</sub>                 |             |           |
| $G_{Nd:Ni:H:Va}^{NdNi_5H_6} = 0.1667{}^{\circ}G_{Nd}^{Dhcp} + 0.8333{}^{\circ}G_{Ni}^{Fcc} + 0.25{}^{\circ}G_{H_2}^{Gas} - 36328 + 36T$        | Para. Set 1 | This work |
| $G_{Nd:Ni:H:H}^{NdNi_5H_6} = 0.1667{}^{\circ}G_{Nd}^{Dhcp} + 0.8333{}^{\circ}G_{Ni}^{Fcc} + 0.75{}^{\circ}G_{H_2}^{Gas} - 41168.616 + 87.596T$ | Para. Set 1 | This work |
| ${}^0L_{Nd:Ni:H:H,Va}^{NdNi_5H_6} = -5107.104 - 14.408T + 0.03488T^2$                                                                          | Para. Set 1 | This work |
| ${}^1L_{Nd:Ni:H:H,Va}^{NdNi_5H_6} = -15764.706 + 29.41T$                                                                                       | Para. Set 1 | This work |
| NdNi <sub>5</sub> H <sub>x</sub> : Model (Nd) <sub>0.1667</sub> (Ni) <sub>0.8333</sub> (H, Va) <sub>0.5</sub> (H, Va) <sub>1</sub>             |             |           |
| $G_{Nd:Ni:Va:Va}^{NdNi_5H_x} = 0.1667{}^{\circ}G_{Nd}^{Dhcp} + 0.8333{}^{\circ}G_{Ni}^{Fcc} - 28248.82 + 4.088T$                               | Para. Set 2 | This work |
| $G_{Nd:Ni:H:Va}^{NdNi_5H_x} = 0.1667{}^{\circ}G_{Nd}^{Dhcp} + 0.8333{}^{\circ}G_{Ni}^{Fcc} + 0.25{}^{\circ}G_{H_2}^{Gas} - 36128 + 36T$        | Para. Set 2 | This work |
| $G_{Nd:Ni:Va:H}^{NdNi_5H_x} = 0.1667{}^{\circ}G_{Nd}^{Dhcp} + 0.8333{}^{\circ}G_{Ni}^{Fcc} + 0.5{}^{\circ}G_{H_2}^{Gas} - 41820.4 + 59.8T$     | Para. Set 2 | This work |

|                                                                                                                                                                        |             |           |
|------------------------------------------------------------------------------------------------------------------------------------------------------------------------|-------------|-----------|
| $G_{Nd:Ni:H:H}^{NdNi_5H_x} = 0.1667^\circ G_{Nd}^{Dhcp} + 0.8333^\circ G_{Ni}^{Fcc} + 0.75^\circ G_{H_2}^{Gas}$<br>$-45390.2 + 97.4T$                                  | Para. Set 2 | This work |
| ${}^0 L_{Nd:Ni:H,Va:Va}^{NdNi_5H_x} = 9000$                                                                                                                            | Para. Set 2 | This work |
| ${}^1 L_{Nd:Ni:H,Va:Va}^{NdNi_5H_x} = 26303.667 - 13.333T$                                                                                                             | Para. Set 2 | This work |
| ${}^0 L_{Nd:Ni:H,Va:H}^{NdNi_5H_x} = -3000$                                                                                                                            | Para. Set 2 | This work |
| ${}^1 L_{Nd:Ni:H,H,Va}^{NdNi_5H_x} = 11000$                                                                                                                            | Para. Set 2 | This work |
| ${}^0 L_{Nd:Ni:Va:H,Va}^{NdNi_5H_x} = 23000$                                                                                                                           | Para. Set 2 | This work |
| MgH <sub>2</sub> : Model (Mg) <sub>2</sub> (H) <sub>1</sub>                                                                                                            |             |           |
| $G_{Mg:H}^{MgH_2} = G^{MgH_2}$                                                                                                                                         |             | [40]      |
| H_Mg <sub>2</sub> NiH <sub>4</sub> : Model (Mg) <sub>2</sub> (Ni) <sub>1</sub> (H, Va) <sub>1</sub>                                                                    |             |           |
| $G_{Mg:Ni:H}^{Mg_2NiH_4} = 3G^{Mg_2Ni} + 2^\circ G_{H_2}^{Gas} - 136003.983 + 350.04T$<br>$-13.7301T \ln T - 0.01299T^2$                                               |             | This work |
| $G_{Mg:Ni:Va}^{Mg_2NiH_4} = 3G^{Mg_2Ni} + 90T$                                                                                                                         |             | This work |
| L_Mg <sub>2</sub> NiH <sub>4</sub> : Model (Mg) <sub>2</sub> (Ni) <sub>1</sub> (H, Va) <sub>1</sub>                                                                    |             |           |
| $G_{Mg:Ni:H}^{Mg_2NiH_4} = 3G^{Mg_2Ni} + 2^\circ G_{H_2}^{Gas} - 144003.983 + 365.788T$<br>$-13.7301T \ln T - 0.01299T^2$                                              |             | This work |
| $G_{Mg:Ni:Va}^{Mg_2NiH_4} = 3G^{Mg_2Ni} + 90T$                                                                                                                         |             | This work |
| NdMgNi <sub>4</sub> H <sub>4</sub> : Model (Nd) <sub>0.1667</sub> (Mg) <sub>0.1667</sub> (Ni) <sub>0.6666</sub> (H, Va) <sub>0.6666</sub>                              |             |           |
| $G_{Nd:Mg:Ni:Va}^{NdMgNi_4H_4} = 0.1667^\circ G_{Nd}^{Dhcp} + 0.1667^\circ G_{Mg}^{Hcp} + 0.6667^\circ G_{Ni}^{Fcc}$<br>$-17333.33 + 10.5T$                            |             | This work |
| $G_{Nd:Mg:Ni:H}^{NdMgNi_4H_4} = 0.1667^\circ G_{Nd}^{Dhcp} + 0.1667^\circ G_{Mg}^{Hcp} + 0.6667^\circ G_{Ni}^{Fcc}$<br>$+0.3333^\circ G_{H_2}^{Gas} - 45947.4 + 35.5T$ |             | This work |
| ${}^1 L_{Nd:Mg:Ni:H}^{NdMgNi_4H_4} = -14000$                                                                                                                           |             | This work |
| NdMg <sub>2</sub> Ni <sub>9</sub> H <sub>12</sub> : Model (Nd) <sub>0.0833</sub> (Mg) <sub>0.1667</sub> (Ni) <sub>0.75</sub> (H, Va) <sub>2.8333</sub>                 |             |           |
| $G_{Nd:Mg:Ni:Va}^{NdMg_2Ni_9H_{12}} = 0.0833^\circ G_{Nd}^{Dhcp} + 0.1667^\circ G_{Mg}^{Hcp} + 0.75^\circ G_{Ni}^{Fcc}$<br>$-21713.34 + 5.09T$                         |             | This work |

$$G_{Nd:Mg:Ni:H}^{NdMg_2Ni_9H_{12}} = 0.0833^{\circ}G_{Nd}^{Dhcp} + 0.1667^{\circ}G_{Mg}^{Hcp} + 0.75^{\circ}G_{Ni}^{Fcc} + 1.4167^{\circ}G_{H_2}^{Gas} - 41475 + 118.5T$$

This work

$${}^0L_{Nd:Mg:Ni:H,Va}^{NdMg_2Ni_9H_{12}} = -31063.75 + 83.75T$$

This work

$${}^1L_{Nd:Mg:Ni:H,Va}^{NdMg_2Ni_9H_{12}} = 2000$$

This work

Note: Temperature  $T$  in Kelvin. The Gibbs energies for the pure elements are from the SGTE compilation [18]. The thermodynamic parameters in the Mg–Ni and Nd–Ni systems are taken from Ref. [19] and [20], respectively. The thermodynamic description of Nd–Mg is mainly based on the evaluation of Qi. et al. [21]. In order to improve the agreement of calculated phase boundary between Liquid and Hcp with the experimental data, the parameters of Liquid and Hcp were slightly modified in present work.

### CIF File of Nd<sub>16</sub>Mg<sub>96</sub>Ni<sub>12</sub>

```

data_Nd16Mg96Ni12
_chemical_name_mineral Nd16Mg96Ni12
_chemical_formula_sum 'Nd16 Mg96 Ni12'
_cell_length_a 15.34197(12)
_cell_length_b 21.67494(16)
_cell_length_c 9.486856(67)
_cell_angle_alpha 90
_cell_angle_beta 90
_cell_angle_gamma 90
_cell_volume 3154.722(40)
_symmetry_space_group_name_H-M Cmc21

loop_
_symmetry_equiv_pos_as_xyz
'-x, -y, z+1/2'
'-x, y, z'
'-x+1/2, -y+1/2, z+1/2'
```

'-x+1/2, y+1/2, z'

'x, -y, z+1/2'

'x, y, z'

'x+1/2, -y+1/2, z+1/2'

'x+1/2, y+1/2, z'

loop\_

\_atom\_site\_label

\_atom\_site\_type\_symbol

\_atom\_site\_symmetry\_multiplicity

\_atom\_site\_fract\_x

\_atom\_site\_fract\_y

\_atom\_site\_fract\_z

\_atom\_site\_occupancy

\_atom\_site\_B\_iso\_or\_equiv

Mg1 Mg 8 0.61974(88) 0.14089(60) 0.7458(43) 1 1.52(11)

Mg2 Mg 8 0.827764(73) 0.65786(58) 0.25242(34) 1 1.52(11)

Mg3 Mg 8 0.273528(96) 0.38488(50) 0.03793(10) 1 1.52(11)

Mg4 Mg 8 0.15249(81) 0.797061(41) 0.2286(21) 1 1.52(11)

Mg5 Mg 8 0.3424(11) 0.24827(93) 0.94987(10) 1 1.52(11)

Mg6 Mg 8 0.16928(37) 0.24102(99) 0.0845(16) 1 1.52(11)

Mg7 Mg 8 0.61657(78) 0.4988(16) 0.4836(25) 1 1.52(11)

Mg8 Mg 4 0.5 0.01007(98) 0.7727(44) 1 1.52(11)

Mg9 Mg 4 0.5 0.25919(93) 0.7398(42) 1 1.52(11)

Mg10 Mg 8 0.87875(95) 0.88552(57) 0.7277(24) 1 1.52(11)

Mg11 Mg 4 0 0.00408(45) 0.26460(38) 1 1.52(11)

Mg12 Mg 4 0 0.294974(72) 0.9251(25) 1 1.52(11)

Mg13 Mg 8 0.393131(75) 0.92322(99) 0.9619(16) 1 1.52(11)

Mg14 Mg 8 0.899059(59) 0.43741(94) 0.52098(14) 1 1.52(11)

Ni1 Ni 8 0.371933(49) 0.578396(32) 0.75597(14) 1 1.28(13)

Ni2 Ni 4 0 0.386425(41) 0.72940(17) 1 1.28(13)

Nd1 Nd 4 0 0.86852(46) 0.4501(11) 1 1.199(52)  
Nd2 Nd 8 0.26581(13) 0.000928(58) 0.7572(12) 1 1.199(52)  
Nd3 Nd 4 0 0.86783(45) 0.0573(11) 1 1.199(52)

## References

- [1] H.E. Swanson, E. Tatge, Standard X-ray diffraction powder patterns I, National Bureau of Standards (U.S.), Circular, 539 (1953) 1-95.
- [2] E.R. Jette, F. Foote, Precision determination of lattice constants, J. Chem. Phys., 3 (1935) 605-616.
- [3] R.L. Carlin, L.J. Krause, A. Lambrecht, H. Claus, Ferromagnetic neodymium dihydride, J. Appl. Phys., 53 (1982) 2634-2636.
- [4] J.L. Soubeyroux, D. Fruchart, A. Mikou, M. Pezat, B. Darriet, Etude structurale du systeme  $Mg_2Ni-H_2$ . I - La solution solide  $Mg_2NiH_x$  ( $x=0.30$ ), Mater. Res. Bull., 19 (1984) 895-904.
- [5] Q. Luo, S.L. Chen, J.Y. Zhang, L. Li, K.C. Chou, Q. Li, Experimental investigation and thermodynamic assessment of Nd-H and Nd-Ni-H systems, Calphad, 51 (2015) 282-291.
- [6] Y. Takaguchi, K. Tanaka, Hydriding-dehydriding characteristics of  $NdNi_5$  and effects of Sn-substitution, J. Alloys Compd., 297 (2000) 73-80.
- [7] A. Drašner, Ž. Blažina, The effect of substitution of Ga for Ni on the hydrogen sorption properties of  $NdNi_5$ , J. Alloys Compd., 381 (2004) 188-191.
- [8] L.M. Zeng, H.F. Franzen, Single-crystal structure investigation of  $NdNi$  and  $NdNi_5$ , J. Alloys Compd., 311 (2000) 226-227.
- [9] A.V. Virkar, A. Raman, Crystal structures of  $AB_3$  and  $A_2B_7$  rare earth-nickel phases, J. Less-Common Met., 18 (1969) 59-66.
- [10] L. Guénée, V. Favre-Nicolin, K. Yvon, Synthesis, crystal structure and hydrogenation properties of the ternary compounds  $LaNi_4Mg$  and  $NdNi_4Mg$ , J. Alloys Compd., 348 (2003) 129-137.
- [11] K. Kadir, D. Noréus, I. Yamashita, Structural determination of  $AMgNi_4$  (where A=Ca, La, Ce, Pr, Nd and Y) in the  $AuBe_5$  type structure, J. Alloys Compd., 345 (2002) 140-143.
- [12] K. Kadir, T. Sakai, I. Uehara, Synthesis and structure determination of a new series of hydrogen storage alloys;  $RMg_2Ni_9$  (R=La, Ce, Pr, Nd, Sm and Gd) built from  $MgNi_2$  laves-type layers alternating with  $AB_5$  layers, J. Alloys Compd., 257 (1997) 115-121.
- [13] Q. Luo, Q.F. Gu, J.Y. Zhang, S.L. Chen, K.C. Chou, Q. Li, Phase equilibria, crystal structure and

- hydriding/dehydriding mechanism of  $\text{Nd}_4\text{Mg}_{80}\text{Ni}_8$  compound, *Sci. Repts.*, 5 (2015) 15385.
- [14] B. Ourane, E. Gaudin, R. Zouari, S. Couillaud, J.L. Bobet,  $\text{NdNiMg}_5$ , a new magnesium-rich phase with an unusual structural type, *Inorg. Chem.*, 52 (2013) 13289-13291.
- [15] K.C. Chou, K.D. Xu, A new model for hydriding and dehydriding reactions in intermetallics, *Intermetallics*, 15 (2007) 767-777.
- [16] K.C. Chou, X.M. Hou, Kinetics of high-temperature oxidation of inorganic nonmetallic materials, *J. Am. Ceram. Soc.*, 92 (2009) 585-594.
- [17] K.C. Chou, Q. Luo, Q. Li, J.Y. Zhang, Influence of the density of oxide on oxidation kinetics, *Intermetallics*, 47 (2014) 17-22.
- [18] A.T. Dinsdale, SGTE data for pure elements, *Calphad*, 15 (1991) 317-425.
- [19] M.H.G. Jacobs, P.J. Spencer, A critical thermodynamic evaluation of the system Mg-Ni, *Calphad*, 22 (1998) 513-525.
- [20] M.L. Huang, R.W. McCallum, T.A. Lograsso, Experimental investigation and thermodynamic modeling of the Nd-Ni system, *J. Alloys Compd.*, 398 (2005) 127-132.
- [21] H.Y. Qi, G.X. Huang, H. Bo, G.L. Xu, L.B. Liu, Z.P. Jin, Thermodynamic description of the Mg-Nd-Zn ternary system, *J. Alloys Compd.*, 509 (2011) 3274-3281.
